# Supplementary figures and images for: Identification and Validation of HEPACAM family member 2 is Correlated with Immune Infiltration as a Prognostic Biomarker in colon adenocarcinoma
Source: Research Square preprint supplement (doi:10.21203/rs.3.rs-1667003/v1), 2022-05-31

A

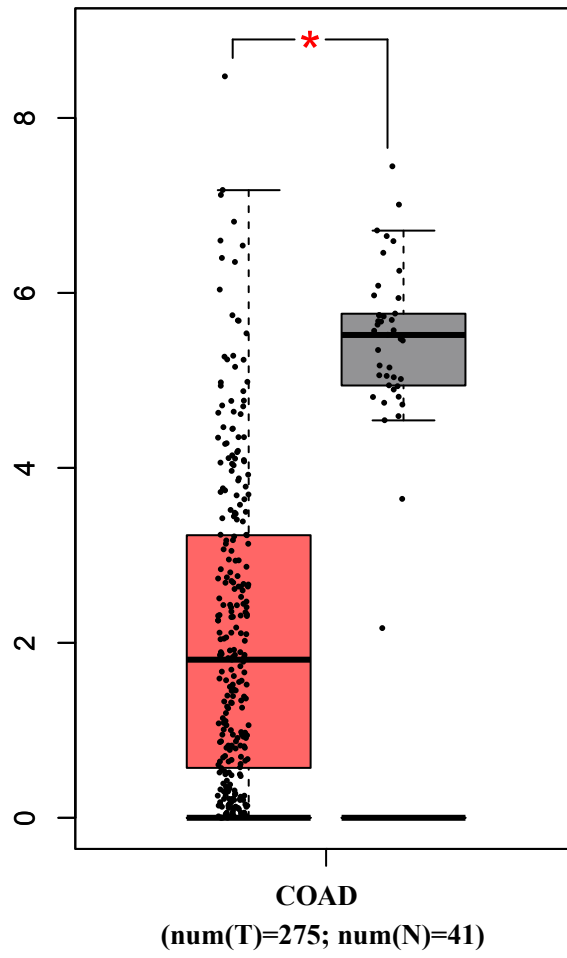

B

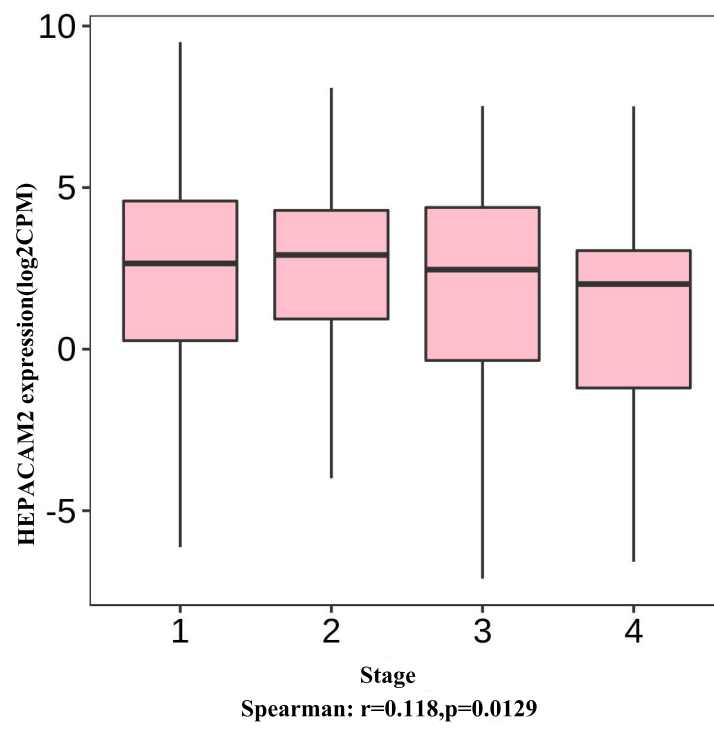

Supplement: Supplementary file 1 [file 935686aadb70dfd8e4deba4a.pdf]

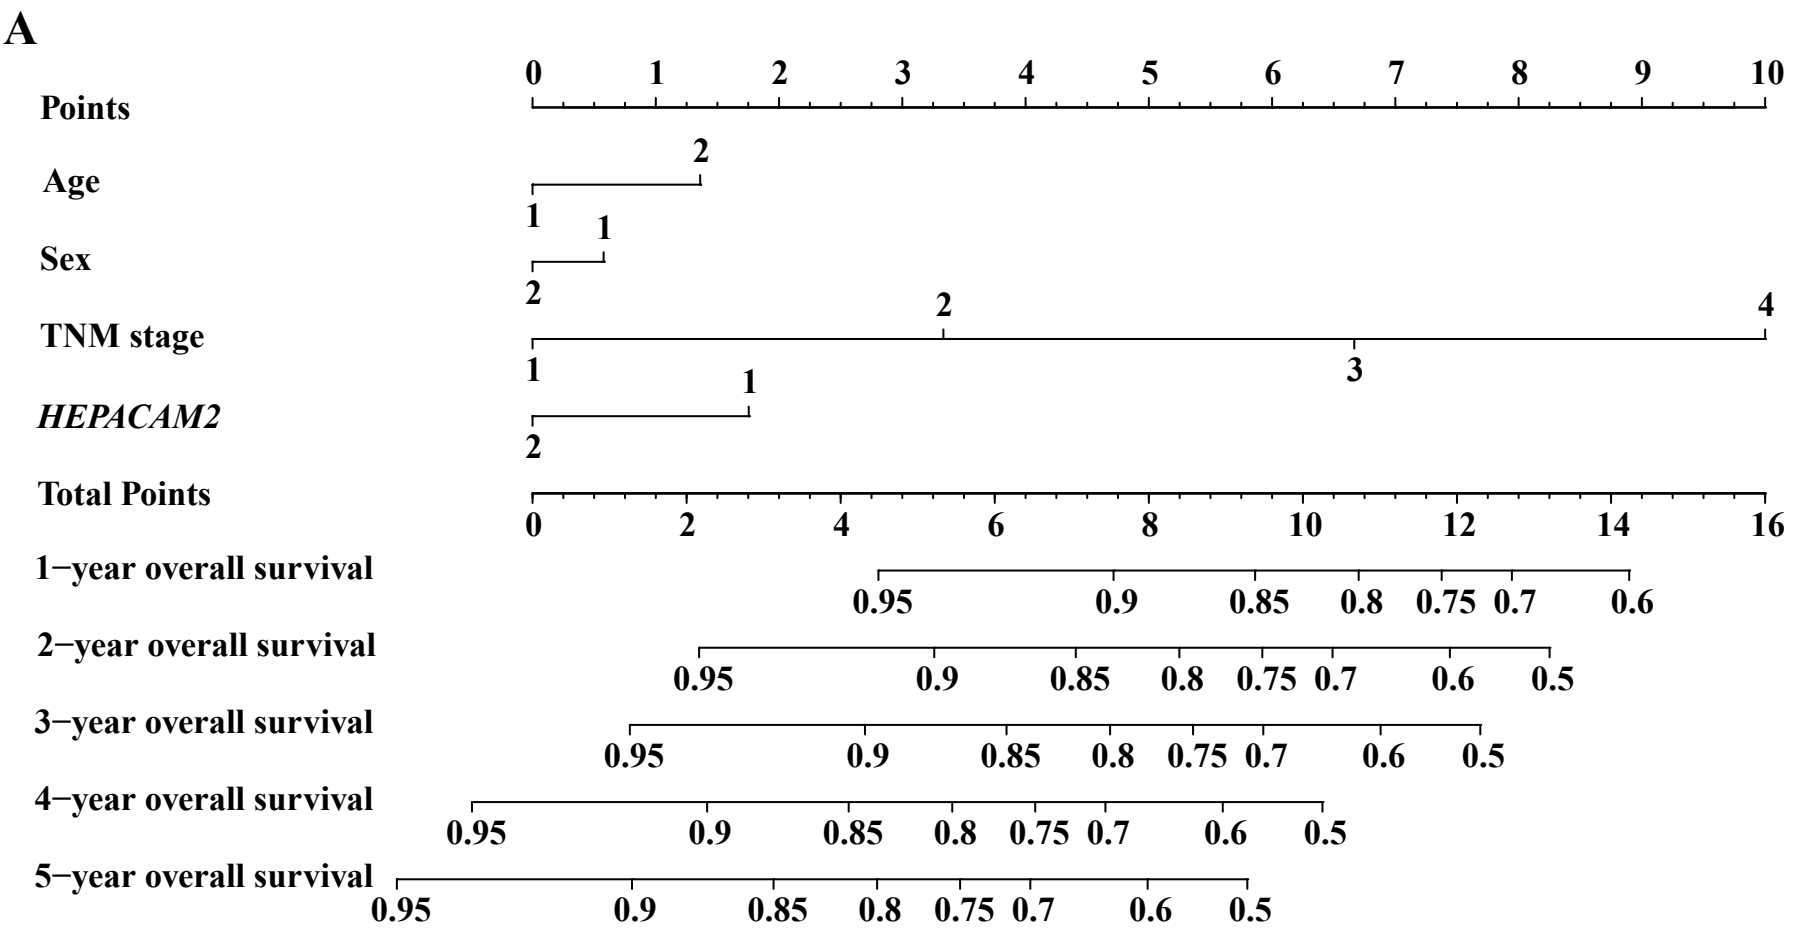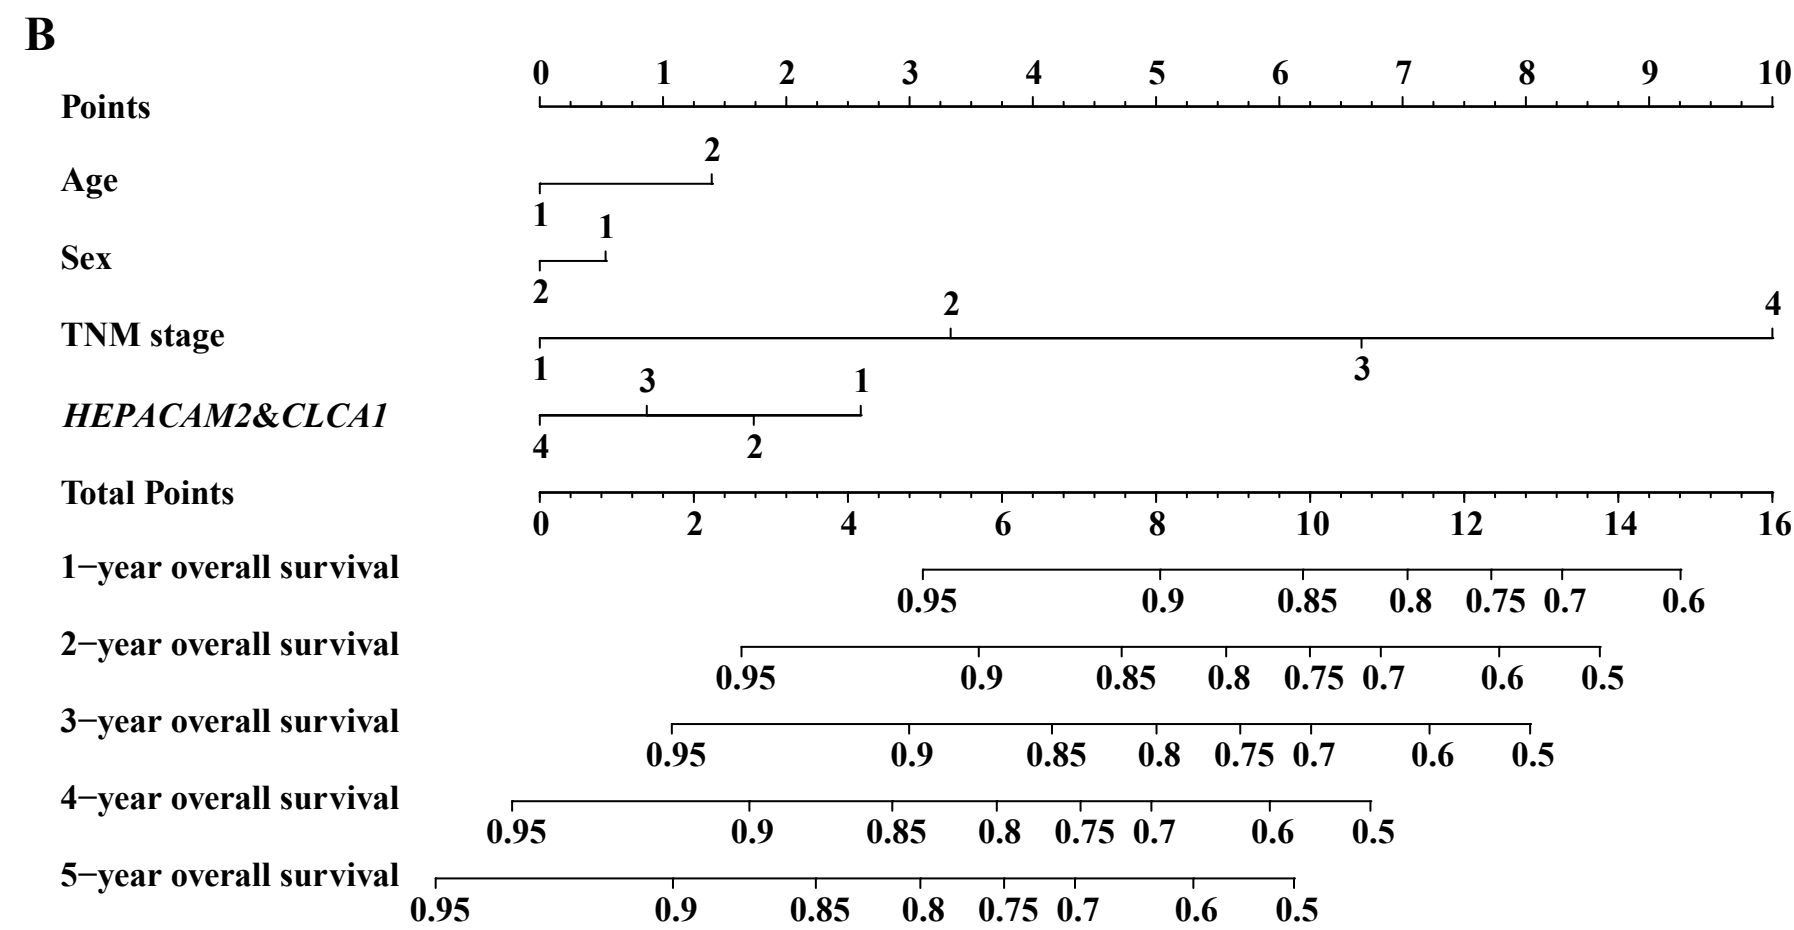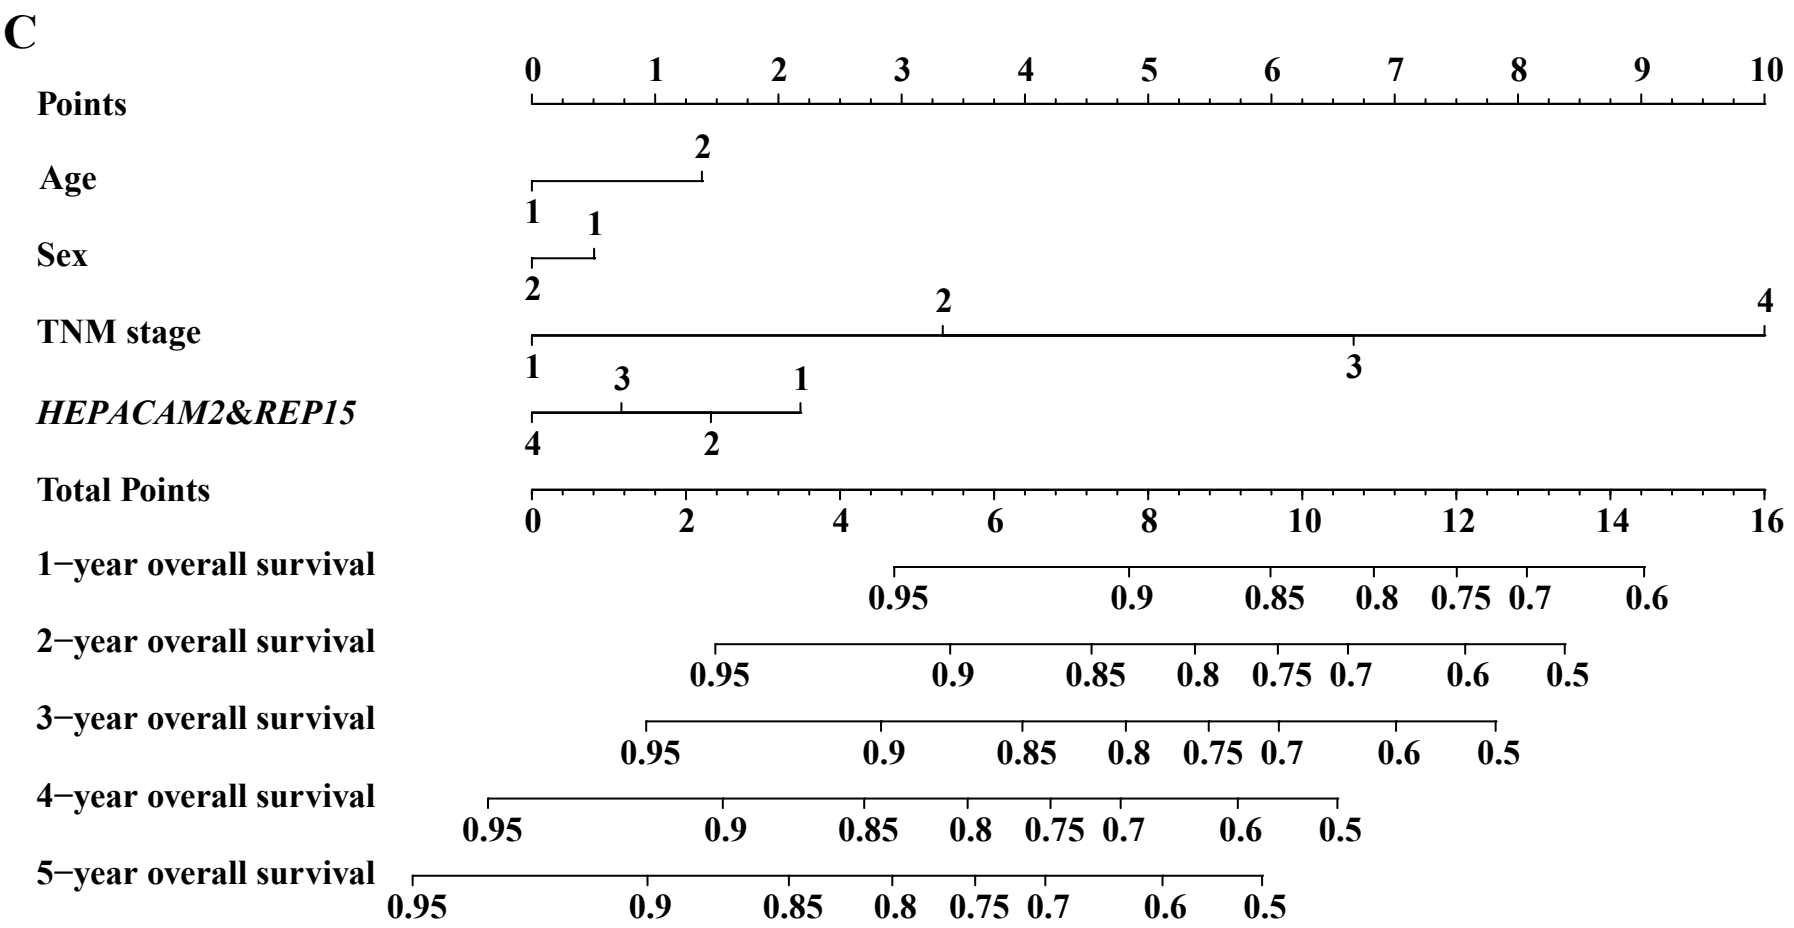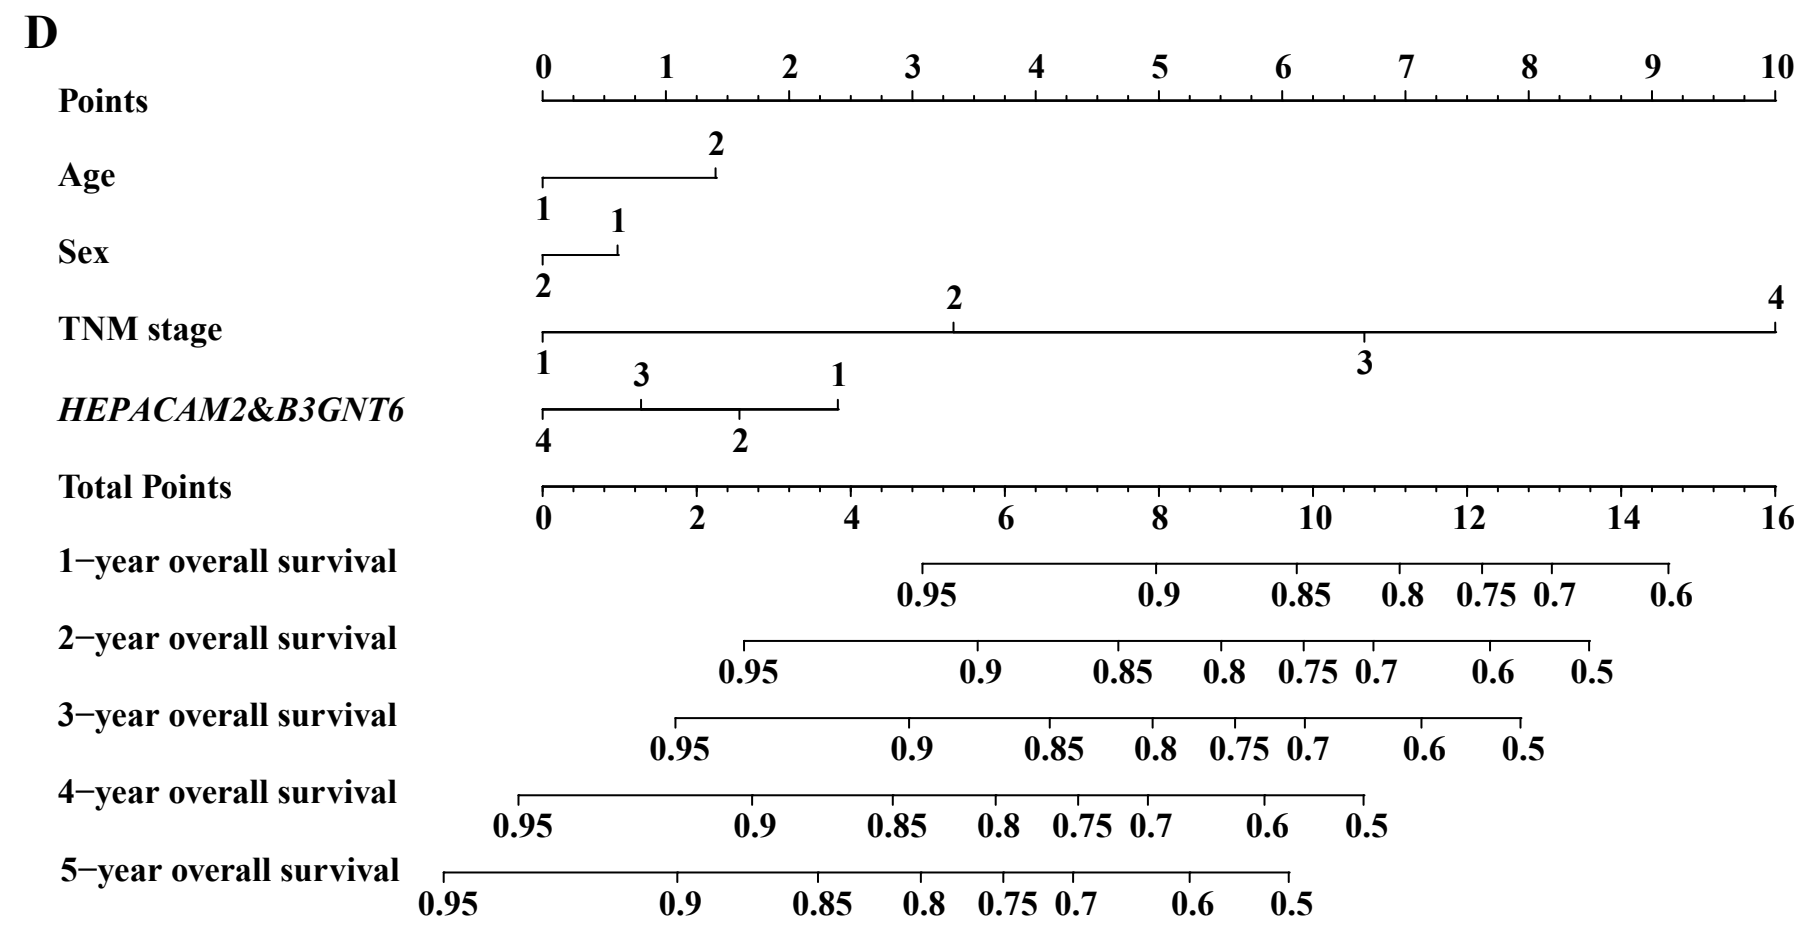

Supplement: Supplementary file 2 [file be88aaf270e632ba000d8f73.pdf]
